# Supplementary material
Source: MDPI journal article supplement (https://www.mdpi.com/2673-7086/2/4/39)
Supplement: s1 [file s1]

**Table S1.** Remote sensing data collected from the CoastSat analysis.

| <b>Data source</b> | <b>Date of acquisition<br/>(year/mm/dd)</b> | <b>Time of acquisition<br/>(GMT)</b> | <b>RMSE (m)</b> | <b>Estimated mean<br/>seal level (m)</b> |
|--------------------|---------------------------------------------|--------------------------------------|-----------------|------------------------------------------|
| Landsat5           | 1986/03/10                                  | 16:55                                | 4.5             | 0.60                                     |
|                    | 1990/03/05                                  | 16:49                                | 4.6             | -0.34                                    |
|                    | 1990/03/21                                  | 16:50                                | 4.5             | -0.32                                    |
|                    | 1990/04/06                                  | 16:49                                | 5.2             | 0.09                                     |
|                    | 1990/04/22                                  | 16:49                                | 5.3             | 0.04                                     |
|                    | 1995/12/16                                  | 16:30                                | 4.1             | -0.22                                    |
|                    | 1995/05/22                                  | 16:36                                | 8.4             | -0.32                                    |
|                    | 1995/05/06                                  | 16:37                                | 6.5             | -0.31                                    |
|                    | 1995/07/09                                  | 16:34                                | 6.3             | 0.23                                     |
|                    | 1995/07/25                                  | 16:34                                | 8.9             | 0.46                                     |
|                    | 1995/11/21                                  | 16:35                                | 4.1             | 0.46                                     |
|                    | 2000/01/28                                  | 17:04                                | 4.0             | -0.19                                    |
|                    | 2000/02/13                                  | 17:03                                | 4.1             | -0.36                                    |
|                    | 2000/04/17                                  | 17:04                                | 5.3             | 0.39                                     |
|                    | 2000/05/03                                  | 17:05                                | 6.7             | 0.40                                     |
|                    | 2000/05/19                                  | 17:05                                | 5.1             | 0.28                                     |
|                    | 2000/09/24                                  | 17:08                                | 5.3             | 0.34                                     |
|                    | 2000/10/10                                  | 17:08                                | 4.8             | 0.36                                     |
|                    | 2000/10/26                                  | 17:08                                | 4.1             | 0.62                                     |
|                    | 2000/12/13                                  | 17:09                                | 3.8             | 0.73                                     |
|                    | 2000/12/29                                  | 17:09                                | 3.8             | 0.47                                     |
|                    | 2005/05/01                                  | 17:16                                | 5.4             | -0.56                                    |
|                    | 2005/05/17                                  | 17:17                                | 6.9             | -0.34                                    |
|                    | 2005/06/02                                  | 17:17                                | 8.2             | -0.03                                    |
|                    | 2005/09/06                                  | 17:17                                | 4.6             | 0.68                                     |
|                    | 2005/08/05                                  | 17:17                                | 7.5             | 0.53                                     |
|                    | 2005/10/24                                  | 17:17                                | 4.2             | 0.28                                     |
|                    | 2005/11/25                                  | 17:18                                | 5.2             | -0.05                                    |
|                    | 2010/02/24                                  | 17:20                                | 4.2             | -0.24                                    |
|                    | 2010/03/28                                  | 17:20                                | 4.4             | 0.36                                     |
|                    | 2010/04/29                                  | 17:20                                | 5.8             | 0.25                                     |
|                    | 2010/06/16                                  | 17:20                                | 5.9             | -0.08                                    |
|                    | 2010/06/23                                  | 17:26                                | 5.3             | 0.28                                     |
|                    | 2010/10/06                                  | 17:19                                | 4.5             | 0.54                                     |
|                    | 2010/11/07                                  | 17:19                                | 3.8             | 0.76                                     |
|                    | 2010/11/30                                  | 17:25                                | 3.8             | -0.26                                    |
| Landsat 8          | 2015/02/06                                  | 17:29                                | 5.3             | 0.49                                     |
|                    | 2015/03/01                                  | 17:35                                | 5.6             | 0.09                                     |
|                    | 2015/03/10                                  | 17:29                                | 5.9             | 0.08                                     |
|                    | 2015/05/29                                  | 17:28                                | 8.8             | 0.01                                     |
|                    | 2015/06/14                                  | 17:28                                | 9.4             | 0.32                                     |
|                    | 2015/06/30                                  | 17:29                                | 10.2            | 0.38                                     |
|                    | 2015/09/25                                  | 17:35                                | 6.8             | 0.32                                     |

|            |            |       |     |       |
|------------|------------|-------|-----|-------|
| Landsat 8  | 2015/10/20 | 17:29 | 5.9 | 0.18  |
|            | 2015/10/27 | 17:35 | 6.8 | 0.74  |
|            | 2015/11/21 | 17:29 | 5.5 | -0.13 |
|            | 2015/12/07 | 17:29 | 5.2 | 0.09  |
|            | 2015/12/14 | 17:36 | 6.1 | 0.56  |
|            | 2015/12/23 | 17:29 | 5.0 | 0.35  |
| Sentinel 2 | 2020/01/06 | 17:47 | <1  | -0.06 |
|            | 2020/01/11 | 17:47 | <1  | 0.72  |
|            | 2020/01/21 | 17:47 | <1  | 0.14  |
|            | 2020/01/26 | 17:47 | <1  | 0.61  |
|            | 2020/02/25 | 17:47 | <1  | 0.51  |
|            | 2020/03/01 | 17:47 | <1  | -0.17 |
|            | 2020/03/16 | 17:47 | <1  | -0.42 |
|            | 2020/03/26 | 17:47 | <1  | 0.36  |
|            | 2020/03/31 | 17:47 | <1  | -0.37 |
|            | 2020/04/05 | 17:47 | <1  | 0.12  |
|            | 2020/04/25 | 17:47 | <1  | 0.20  |
|            | 2020/04/30 | 17:47 | <1  | -0.50 |
|            | 2020/05/05 | 17:47 | <1  | 0.25  |
|            | 2020/05/10 | 17:47 | <1  | -0.09 |
|            | 2020/05/15 | 17:47 | <1  | -0.34 |
